# Supplementary material for: Generalized models to estimate carbon and nitrogen stocks of organic soil layers in Interior Alaska
Source: Copernicus journal article supplement (doi:10.5194/essd-2019-114), 2019-08-06
Supplement: Supplementary file 1 [file essd-2019-114-supplement.pdf]

***Supplemental Information***

Table S1. Transformation used to improve normality. We were unable to find a way to improve normality for live moss (L) bulk density.

| <b>Transformation</b> | <b>Where used</b>                                                                     |
|-----------------------|---------------------------------------------------------------------------------------|
| Log                   | Bulk density: D, F, M, amorphous<br>N: fibrous<br>C:N D, M, fibrous, amorphous        |
| Square root           | Bulk density: H<br>N: D, amorphous<br>C:N: L, F, mineral                              |
| Box cox               | Bulk density: mineral, fibrous<br>C: all horizons<br>N: L, F, M, H, mineral<br>C:N: H |

Table S2. Average bulk density values by drainage and age class. Standard deviations are presented in parenthesis. Significant differences for a horizon code among drainage or age class are noted with superscripts.

| Horizon Type    | Drainage Class                          |                                        |                                          |                                         |                                         | Age class                              |                                         |                                         |
|-----------------|-----------------------------------------|----------------------------------------|------------------------------------------|-----------------------------------------|-----------------------------------------|----------------------------------------|-----------------------------------------|-----------------------------------------|
|                 | Well                                    | Moderately well                        | Somewhat Poorly                          | Poorly                                  | Very poorly                             | New                                    | Young                                   | Mature                                  |
| L: live moss    | 0.027 <sup>ab</sup><br>(0.023)<br>n=6   | 0.020 <sup>ab</sup><br>(0.020)<br>n=12 | 0.023 <sup>a</sup><br>(0.021)<br>n=71    | 0.025 <sup>a</sup><br>(0.014)<br>n=18   | 0.015 <sup>b</sup><br>(0.010)<br>n=33   | 0.020<br>(---)<br>n=1                  | 0.022<br>(0.024)<br>n=48                | 0.021<br>(0.015)<br>n=92                |
| D: dead moss    | 0.049 <sup>ab*</sup><br>(0.025)<br>n=10 | 0.054 <sup>ab</sup><br>(0.044)<br>n=45 | 0.036 <sup>b*</sup><br>(0.020)<br>n=142  | 0.038 <sup>b*</sup><br>(0.028)<br>n=30  | 0.038 <sup>b</sup><br>(0.024)<br>n=313  | 0.055 <sup>a</sup><br>(0.037)<br>n=19  | 0.036 <sup>b</sup><br>(0.017)<br>n=253  | 0.041 <sup>b</sup><br>(0.031)<br>n=268  |
| F: fibric       | 0.153 <sup>a</sup><br>(0.096)<br>n=12   | 0.075 <sup>b</sup><br>(0.032)<br>n=39  | 0.072 <sup>b</sup><br>(0.041)<br>n=188   | 0.065 <sup>bc</sup><br>(0.043)<br>n=79  | 0.053 <sup>c</sup><br>(0.031)<br>n=234  | 0.083<br>(0.056)<br>n=83               | 0.056<br>(0.035)<br>n=207               | 0.066<br>(0.039)<br>n=262               |
| M: mesic        | 0.186 <sup>a</sup><br>(0.061)<br>n=5    | 0.164 <sup>a</sup><br>(0.072)<br>n=35  | 0.172 <sup>a</sup><br>(0.078)<br>n=264   | 0.149 <sup>a</sup><br>(0.077)<br>n=89   | 0.121 <sup>b</sup><br>(0.067)<br>n=241  | 0.173<br>(0.088)<br>n=62               | 0.122<br>(0.060)<br>n=197               | 0.159<br>(0.079)<br>n=375               |
| H: humic        | ---<br>(---)<br>n=0                     | 0.270 <sup>ab</sup><br>(0.176)<br>n=11 | 0.251 <sup>a</sup><br>(0.076)<br>n=62    | 0.214 <sup>a</sup><br>(0.099)<br>n=17   | 0.174 <sup>b</sup><br>(0.078)<br>n=70   | 0.201<br>(0.097)<br>n=17               | 0.199<br>(0.107)<br>n=58                | 0.228<br>(0.087)<br>n=85                |
| Min: mineral    | 0.799<br>(0.349)<br>n=63                | 0.810<br>(0.455)<br>n=49               | 0.722<br>(0.382)<br>n=375                | 0.663<br>(0.339)<br>n=67                | 0.722<br>(0.353)<br>n=31                | 0.859 <sup>a</sup><br>(0.367)<br>n=163 | 0.787 <sup>b*</sup><br>(0.418)<br>n=89  | 0.654 <sup>b</sup><br>(0.356)<br>n=333  |
| Fibrous (D&F)   | 0.105 <sup>a</sup><br>(0.089)<br>n=22   | 0.064 <sup>b</sup><br>(0.040)<br>n=84  | 0.057 <sup>bc*</sup><br>(0.038)<br>n=330 | 0.057 <sup>bc</sup><br>(0.041)<br>n=109 | 0.047 <sup>c*</sup><br>(0.028)<br>n=574 | 0.078 <sup>a</sup><br>(0.054)<br>n=102 | 0.045 <sup>b*</sup><br>(0.028)<br>n=460 | 0.053 <sup>b*</sup><br>(0.038)<br>n=530 |
| Amorphous (M&H) | 0.186 <sup>ab*</sup><br>(0.061)<br>n=5  | 0.189 <sup>a</sup><br>(0.113)<br>n=46  | 0.187 <sup>a</sup><br>(0.084)<br>n=326   | 0.159 <sup>a</sup><br>(0.084)<br>n=106  | 0.133 <sup>b*</sup><br>(0.073)<br>n=311 | 0.179<br>(0.090)<br>n=79               | 0.140<br>(0.080)<br>n=255               | 0.172<br>(0.085)<br>n=460               |

\*p-value very close to 0.05 (D = 0.06, Min = 0.06, fibrous = 0.06, amorphous = 0.04). These values are so close to our threshold of 0.05 we would like to recognize that there is a chance that the bulk density values are [not] significantly different from each other.

Table S3. Average carbon (%) values by drainage and age class. Standard deviations are presented in parenthesis. Significant differences for a horizon code among drainage or age classes are noted with superscripts.

| Horizon Type    | Drainage Class                      |                                     |                                      |                                       |                                      | Age class                            |                                     |                                     |
|-----------------|-------------------------------------|-------------------------------------|--------------------------------------|---------------------------------------|--------------------------------------|--------------------------------------|-------------------------------------|-------------------------------------|
|                 | Well                                | Moderately well                     | Somewhat Poorly                      | Poorly                                | Very poorly                          | New                                  | Young                               | Mature                              |
| L: live moss    | 44.3 <sup>a</sup><br>(5.1)<br>n=6   | 42.6 <sup>b</sup><br>(1.5)<br>n=11  | 41.0 <sup>b</sup><br>(4.7)<br>n=75   | 42.9 <sup>b</sup><br>(1.9)<br>n=18    | 42.0 <sup>b</sup><br>(2.3)<br>n=34   | 40.7<br>(6.1)<br>n=2                 | 41.3<br>(3.3)<br>n=48               | 42.0<br>(4.1)<br>n=95               |
| D: dead moss    | 42.9 <sup>ab</sup><br>(3.3)<br>n=10 | 44.0 <sup>a</sup><br>(2.3)<br>n=43  | 41.1 <sup>b</sup><br>(5.9)<br>n=145  | 43.0 <sup>a</sup><br>(2.0)<br>n=30    | 43.1 <sup>a</sup><br>(2.4)<br>n=310  | 41.2<br>(5.2)<br>n=19                | 42.5<br>(2.5)<br>n=242              | 42.8<br>(4.6)<br>n=277              |
| F: fibric       | 34.0 <sup>a</sup><br>(7.6)<br>n=12  | 43.2 <sup>bd</sup><br>(6.3)<br>n=39 | 39.6 <sup>c</sup><br>(7.3)<br>n=194  | 42.4 <sup>bc</sup><br>(3.9)<br>n=84   | 41.6 <sup>d</sup><br>(3.1)<br>n=237  | 39.7 <sup>a</sup><br>(6.9)<br>n=85   | 40.5 <sup>b</sup><br>(4.0)<br>n=210 | 41.8 <sup>a</sup><br>(6.0)<br>n=271 |
| M: mesic        | 30.0 <sup>a</sup><br>(6.3)<br>n=5   | 41.3 <sup>bd</sup><br>(7.2)<br>n=33 | 37.3 <sup>bc</sup><br>(7.5)<br>n=268 | 37.3 <sup>c</sup><br>(6.5)<br>n=89    | 39.1 <sup>d</sup><br>(5.6)<br>n=255  | 35.4 <sup>a</sup><br>(8.0)<br>n=63   | 36.9 <sup>b</sup><br>(6.6)<br>n=204 | 39.3 <sup>c</sup><br>(6.4)<br>n=383 |
| H: humic        | ---<br>(---)<br>n=0                 | 36.1 <sup>a</sup><br>(6.7)<br>n=12  | 27.7 <sup>b</sup><br>(5.6)<br>n=63   | 32.9 <sup>a</sup><br>(6.0)<br>n=17    | 35.0 <sup>a</sup><br>(5.3)<br>n=72   | 31.3<br>(6.4)<br>n=18                | 34.6<br>(5.8)<br>n=60               | 30.5<br>(6.7)<br>n=86               |
| Min: mineral    | 4.3 <sup>a</sup><br>(7.0)<br>n=73   | 5.0 <sup>a</sup><br>(5.9)<br>n=57   | 6.5 <sup>b</sup><br>(6.1)<br>n=436   | 7.3 <sup>b</sup><br>(5.5)<br>n=73     | 11.1 <sup>c</sup><br>(5.5)<br>n=35   | 4.3 <sup>a</sup><br>(5.0)<br>n=197   | 7.2 <sup>b</sup><br>(6.5)<br>n=107  | 7.4 <sup>b</sup><br>(6.5)<br>n=370  |
| Fibrous (D&F)   | 38.1 <sup>a</sup><br>(7.4)<br>n=22  | 43.6 <sup>bd</sup><br>(4.6)<br>n=82 | 40.2 <sup>c</sup><br>(6.8)<br>n=339  | 42.6 <sup>b</sup><br>(3.5)<br>n=114   | 42.4 <sup>d</sup><br>(2.8)<br>n=547  | 40.0 <sup>ac</sup><br>(6.6)<br>n=104 | 41.6 <sup>b</sup><br>(3.4)<br>n=452 | 42.3 <sup>c</sup><br>(5.4)<br>n=548 |
| Amorphous (M&H) | 30.0 <sup>a*</sup><br>(6.3)<br>n=5  | 39.9 <sup>b*</sup><br>(7.4)<br>n=45 | 35.5 <sup>bc</sup><br>(8.1)<br>n=331 | 36.6 <sup>ac*</sup><br>(6.6)<br>n=106 | 38.2 <sup>d*</sup><br>(5.8)<br>n=327 | 34.5 <sup>a</sup><br>(7.8)<br>n=81   | 36.3 <sup>a</sup><br>(6.5)<br>n=264 | 37.7 <sup>b</sup><br>(7.3)<br>n=469 |

\*p-value very close to 0.05 (moderately well vs poorly = 0.046, moderately well vs very poorly = 0.046, poorly vs well = 0.064). These values are so close to our threshold of 0.05 we would like to recognize that there is a chance that the carbon values are [not] significantly different from each other.

Table S4. Average nitrogen (%) values by drainage and age class. Standard deviations are presented in parenthesis. Significant differences for a horizon code among drainage or age classes are noted with superscripts.

| Horizon Type    | Drainage Class                         |                                       |                                        |                                       |                                        | Age class                            |                                       |                                       |
|-----------------|----------------------------------------|---------------------------------------|----------------------------------------|---------------------------------------|----------------------------------------|--------------------------------------|---------------------------------------|---------------------------------------|
|                 | Well                                   | Moderately well                       | Somewhat Poorly                        | Poorly                                | Very poorly                            | New                                  | Young                                 | Mature                                |
| L: live moss    | 0.92 <sup>a</sup><br>(0.16)<br>n=6     | 0.78 <sup>a</sup><br>(0.12)<br>n=12   | 0.90 <sup>a</sup><br>(0.31)<br>n=75    | 0.81 <sup>a</sup><br>(0.15)<br>n=18   | 0.72 <sup>b</sup><br>(0.15)<br>n=34    | 1.26 <sup>a</sup><br>(0.56)<br>n=2   | 0.93 <sup>a</sup><br>(0.29)<br>n=48   | 0.78 <sup>b</sup><br>(0.21)<br>n=95   |
| D: dead moss    | 1.10 <sup>a</sup><br>(0.26)<br>n=10    | 0.86 <sup>b</sup><br>(0.29)<br>n=43   | 0.71 <sup>c*</sup><br>(0.27)<br>n=144  | 0.75 <sup>bc</sup><br>(0.18)<br>n=30  | 0.78 <sup>c*</sup><br>(0.26)<br>n=310  | 0.84 <sup>a</sup><br>(0.27)<br>n=19  | 0.78 <sup>b</sup><br>(0.26)<br>n=241  | 0.75 <sup>ab</sup><br>(0.28)<br>n=277 |
| F: fibric       | 0.92 <sup>ab</sup><br>(0.16)<br>n=12   | 0.93 <sup>ab</sup><br>(0.30)<br>n=39  | 0.89 <sup>a</sup><br>(0.25)<br>n=193   | 1.17 <sup>b*</sup><br>(0.61)<br>n=83  | 0.99 <sup>ab*</sup><br>(0.45)<br>n=237 | 0.97 <sup>ab</sup><br>(0.35)<br>n=84 | 0.97 <sup>b</sup><br>(0.33)<br>n=209  | 0.99 <sup>b</sup><br>(0.49)<br>n=271  |
| M: mesic        | 0.90 <sup>a</sup><br>(0.20)<br>n=5     | 1.08 <sup>ab</sup><br>(0.30)<br>n=33  | 1.23 <sup>b</sup><br>(0.43)<br>n=267   | 1.66 <sup>c</sup><br>(0.51)<br>n=91   | 1.60 <sup>c</sup><br>(0.57)<br>n=255   | 1.25<br>(0.38)<br>n=63               | 1.30<br>(0.36)<br>n=203               | 1.52<br>(0.61)<br>n=385               |
| H: humic        | ---<br>(---)<br>n=0                    | 1.11 <sup>a</sup><br>(0.19)<br>n=12   | 1.26 <sup>a</sup><br>(0.29)<br>n=63    | 2.02 <sup>b</sup><br>(0.44)<br>n=17   | 1.72 <sup>c</sup><br>(0.36)<br>n=72    | 1.46 <sup>a</sup><br>(0.55)<br>n=18  | 1.71 <sup>ab</sup><br>(0.39)<br>n=60  | 1.42 <sup>b</sup><br>(0.41)<br>n=86   |
| Min: mineral    | 0.18 <sup>a*</sup><br>(0.21)<br>n=73   | 0.29 <sup>b*</sup><br>(0.32)<br>n=57  | 0.33 <sup>c</sup><br>(0.29)<br>n=437   | 0.48 <sup>d</sup><br>(0.39)<br>n=73   | 0.63 <sup>d</sup><br>(0.34)<br>n=33    | 0.22 <sup>a</sup><br>(0.22)<br>n=198 | 0.36 <sup>b</sup><br>(0.31)<br>n=105  | 0.40 <sup>b</sup><br>(0.34)<br>n=370  |
| Fibrous (D&F)   | 1.00 <sup>acd*</sup><br>(0.22)<br>n=22 | 0.89 <sup>abd</sup><br>(0.30)<br>n=82 | 0.81 <sup>bd*</sup><br>(0.27)<br>n=337 | 1.05 <sup>c</sup><br>(0.56)<br>n=113  | 0.87 <sup>d</sup><br>(0.37)<br>n=547   | 0.94 <sup>a</sup><br>(0.34)<br>n=103 | 0.87 <sup>ab</sup><br>(0.31)<br>n=450 | 0.87 <sup>b</sup><br>(0.41)<br>n=548  |
| Amorphous (M&H) | 0.90 <sup>a</sup><br>(0.20)<br>n=5     | 1.09 <sup>a</sup><br>(0.28)<br>n=45   | 1.23 <sup>a</sup><br>(0.41)<br>n=330   | 1.72 <sup>bc</sup><br>(0.52)<br>n=108 | 1.62 <sup>c</sup><br>(0.53)<br>n=327   | 1.30 <sup>ab</sup><br>(0.43)<br>n=81 | 1.39 <sup>a</sup><br>(0.40)<br>n=263  | 1.50 <sup>b</sup><br>(0.58)<br>n=471  |

\*p-value very close to 0.05 (D = 0.053, F = 0.059, Min = 0.047, fibrous = 0.044). These values are so close to our threshold of 0.05 we would like to recognize that there is a chance that the nitrogen values of these two drainage classes are [not] significantly different from each other.

Table S5. C:N ratio values by drainage and age class. Standard deviations are presented in parenthesis. Significant differences for a horizon code among drainage or age classes are noted with superscripts.

| Horizon Type    | Drainage Class                  |                                  |                                  |                                   |                                  | Age class                        |                                  |                                   |
|-----------------|---------------------------------|----------------------------------|----------------------------------|-----------------------------------|----------------------------------|----------------------------------|----------------------------------|-----------------------------------|
|                 | Well                            | Moderately well                  | Somewhat Poorly                  | Poorly                            | Very poorly                      | New                              | Young                            | Mature                            |
| L: live moss    | 50 <sup>a</sup><br>(12)<br>n=6  | 56 <sup>a*</sup><br>(9)<br>n=12  | 51 <sup>a</sup><br>(18)<br>n=75  | 55 <sup>a</sup><br>(10)<br>n=18   | 60 <sup>b*</sup><br>(12)<br>n=34 | 35 <sup>a</sup><br>(11)<br>n=2   | 48 <sup>a</sup><br>(14)<br>n=48  | 57 <sup>b</sup><br>(15)<br>n=95   |
| D: dead moss    | 41 <sup>a</sup><br>(9)<br>n=10  | 59 <sup>b</sup><br>(27)<br>n=43  | 67 <sup>b</sup><br>(31)<br>n=144 | 60 <sup>bc</sup><br>(13)<br>n=30  | 61 <sup>c</sup><br>(19)<br>n=310 | 56 <sup>a</sup><br>(14)<br>n=19  | 60 <sup>b</sup><br>(19)<br>n=241 | 65 <sup>ab</sup><br>(26)<br>n=277 |
| F: fibric       | 38 <sup>a</sup><br>(10)<br>n=12 | 50 <sup>bc</sup><br>(14)<br>n=39 | 47 <sup>b</sup><br>(12)<br>n=193 | 46 <sup>ac</sup><br>(23)<br>n=83  | 49 <sup>b</sup><br>(18)<br>n=237 | 46 <sup>ab</sup><br>(18)<br>n=84 | 47 <sup>b</sup><br>(17)<br>n=209 | 49 <sup>b</sup><br>(16)<br>n=271  |
| M: mesic        | 33 <sup>ac</sup><br>(4)<br>n=5  | 41 <sup>a</sup><br>13<br>n=33    | 34 <sup>a</sup><br>(14)<br>n=267 | 24 <sup>b</sup><br>(8)<br>n=89    | 28 <sup>c</sup><br>(12)<br>n=255 | 30<br>(10)<br>n=63               | 31<br>(11)<br>n=203              | 31<br>(14)<br>n=383               |
| H: humic        | ---<br>(---)<br>n=0             | 33 <sup>a</sup><br>(5)<br>n=12   | 23 <sup>b</sup><br>(6)<br>n=63   | 17 <sup>c</sup><br>(3)<br>n=17    | 21 <sup>b</sup><br>(6)<br>n=72   | 24 <sup>a*</sup><br>(7)<br>n=18  | 21 <sup>ab*</sup><br>(6)<br>n=60 | 23 <sup>b</sup><br>(7)<br>n=86    |
| Min: mineral    | 18 <sup>a</sup><br>(9)<br>n=73  | 17 <sup>a</sup><br>(8)<br>n=55   | 18 <sup>b*</sup><br>(7)<br>n=436 | 17 <sup>a</sup><br>(4)<br>n=73    | 17 <sup>a*</sup><br>(3)<br>n=33  | 18<br>(7)<br>n=196               | 19<br>(5)<br>n=105               | 18<br>(8)<br>n=370                |
| Fibrous (D&F)   | 39 <sup>a</sup><br>(10)<br>n=22 | 55 <sup>b</sup><br>(22)<br>n=82  | 56 <sup>b</sup><br>(24)<br>n=337 | 50 <sup>ab</sup><br>(22)<br>n=113 | 56 <sup>c</sup><br>(19)<br>n=547 | 47 <sup>a</sup><br>(18)<br>n=103 | 54 <sup>b</sup><br>(19)<br>n=450 | 57 <sup>c</sup><br>(23)<br>n=548  |
| Amorphous (M&H) | 33 <sup>ac</sup><br>(4)<br>n=5  | 39 <sup>a</sup><br>(12)<br>n=45  | 32 <sup>a</sup><br>(13)<br>n=330 | 23 <sup>b</sup><br>(7)<br>n=108   | 26 <sup>c</sup><br>(11)<br>n=327 | 29<br>(10)<br>n=81               | 29<br>(11)<br>n=263              | 29<br>(14)<br>n=469               |

\*p-values very close to 0.05 (L = 0.044, H = 0.055, Min = 0.045). These values are so close to our threshold of 0.05 we would like to recognize that there is a chance that the CN values of these two classes are [not] significantly different from each other.
